# Supplementary material for: Climbing fibers provide essential instructive signals for associative learning
Source: PubMed Central journal article supplement (PMC11088996; doi:10.1038/s41593-024-01594-7), 2024-04-02
Supplement: 41593_2024_1594_MOESM1_ESM.pdf [file 41593_2024_1594_MOESM1_ESM.pdf]

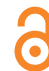

---

# Climbing fibers provide essential instructive signals for associative learning

---

In the format provided by the authors and unedited

| Fig #        | Experimental Condition | Expression strategy    | Mouse genotype  | Virus                                   | Promoter | Cell type targeted | Fiber placement |
|--------------|------------------------|------------------------|-----------------|-----------------------------------------|----------|--------------------|-----------------|
| 1, 6, S1, S3 | CF-ChR2                | viral                  | wt(C57Bl6)      | AAV-CamKII-ChR2 (titer $\sim 10^{12}$ ) | CaMKII   | CF                 | Ctx/IO          |
| 1, 6, S1, S3 | CF-ChR2-LE             | Viral – Low Expression | wt(C57Bl6)      | AAV-CamKII-ChR2 (titer $\sim 10^{11}$ ) | CaMKII   | CF                 | IO              |
| S1           | vGlut2-ChR2-IO         | transgenic             | vGlut2-Cre;ChR2 | -                                       | vGlut2   | IO-glut            | IO              |
| 2, 3, S2     | Pkj-ChR2               | transgenic             | L7-Cre;ChR2     | -                                       | L7       | Pkj                | Ctx             |
| 4            | Gabra6-ChR2-Ctx        | transgenic             | Gabra6-Cre;ChR2 | -                                       | Gabra6   | GC                 | Ctx             |
| 5            | CF-Jaws                | viral                  | wt(C57Bl6)      | AAV-CamKII-Jaws (titer $\sim 10^{12}$ ) | CaMKII   | CF                 | IO              |

**Supplementary Table 1.** Summary of genetic and anatomical targeting approaches used for selective targeting of individual cerebellar circuit elements.

| Fig #   | Test             | Independent Variable (IV)             | IV levels                 | Dependent variable       | p value     | n (mice/cells)   |
|---------|------------------|---------------------------------------|---------------------------|--------------------------|-------------|------------------|
| 1f      | paired t-test    | CF-ChR2 spont vs during laser         | SSpk rate                 |                          | 0.22        | 4 cells, 2 mice  |
| 1f      | paired t-test    | CF-ChR2 spont vs during laser         | CSpk rate                 |                          | 0.02        | 4 cells, 2 mice  |
| 1h      | paired t-test    | CF-ChR2-LE spont vs during laser      | SSpk rate                 |                          | 0.107       | 8 cells, 2 mice  |
| 1h      | paired t-test    | CF-ChR2-LE spont vs during laser      | CSpk rate                 |                          | 0.01        | 8 cells, 2 mice  |
| 1j      | 2 sample t-test  | CF-ChR2 vs LE                         | % CR                      | last session of learning | 0.115       | 7 vs 4 mice      |
| 1j      | 2 sample t-test  | CF-ChR2 vs blue light ctls            | % CR                      | last session of learning | 1.7726e-04  | 7 vs 2 mice      |
| 1j      | 2 sample t-test  | CF-ChR2-LE vs blue light ctls         | % CR                      | last session of learning | 4.0836e-05  | 4 vs 2 mice      |
| 1j, S1o | 2 sample t-test  | CF-ChR2 vs airpuff ctls               | % CR                      | last session of learning | 0.2939      | 7 vs 3 mice      |
| 1j, S1o | 2 sample t-test  | CF-ChR2-LE vs airpuff ctls            | % CR                      | last session of learning | 0.540       | 4 vs 3 mice      |
| 1m      | paired t-test    | CF-ChR2 300 vs 500ms                  | CR timing (peak amp)      | last session of learning | 0.014       | 4 mice           |
| S1h     | paired t-test    | CF-ChR2-Ctx spont vs during laser     | SSpk rate                 |                          | 0.002       | 15 cells, 5 mice |
| S1h     | paired t-test    | CF-ChR2-Ctx spont vs during laser     | CSpk rate                 |                          | 1.81969e-06 | 15 cells, 5 mice |
| S1i     | 2 sample t-test  | CF-ChR2 IO vs Ctx                     | % CR                      | last session of learning | 0.71        | 3 vs 4 mice      |
| S1k     | 2 sample t-test  | CF-ChR2 IO vs Ctx                     | CR timing (peak amp)      | last session of learning | 0.37        | 3 vs 4 mice      |
| S1o     | 2 sample t-test  | vGlut2-ChR2 vs ChR2 ctls              | % CR                      | last session of learning | 0.94        | 3 vs 3 mice      |
| 2e      | paired t-test    | Pkj-ChR2 low vs medium                | blink to laser (peak amp) |                          | 0.047       | 4 mice           |
| 2g, S1o | 2 sample t-test  | Pkj-ChR2 vs airpuff ctls              | % CR                      | last session of learning | 0.917       | 4 vs 3 mice      |
| 2g, 1j  | 2 sample t-test  | Pkj-ChR2 vs CF-ChR2                   | % CR                      | last session of learning | 0.2419      | 4 vs 7 mice      |
| 2g, 1j  | 2 sample t-test  | Pkj-ChR2 vs CF-ChR2-LE                | % CR                      | last session of learning | 0.7545      | 4 vs 4 mice      |
| 3d      | 2 sample t-test  | Pkj-ChR2 200 vs 400ms ISI             | CR timing (peak amp)      | last session of learning | 0.009       | 4 vs 4 mice      |
| 3h      | 2 sample t-test  | Pkj-ChR2 100 vs 300ms laser           | CR timing (peak amp)      | last session of learning | 0.87        | 4 vs 2 mice      |
| 3l      | 2 sample t-test  | Pkj-ChR2 high vs medium power         | CR timing (peak amp)      | last session of learning | 0.67        | 4 vs 3 mice      |
| S2d     | paired t-test    | Pkj-ChR2 spont vs during laser        | SSpk rate                 |                          | 4.8e-7      | 3 cells, 2 mice  |
| S2d     | paired t-test    | Pkj-ChR2 spont vs post laser          | SSpk rate                 |                          | 0.0003      | 3 cells, 2 mice  |
| S2d     | paired t-test    | Pkj-ChR2 spont vs during laser        | CSpk rate                 |                          | 0.2228      | 3 cells, 2 mice  |
| S2d     | paired t-test    | Pkj-ChR2 spont vs post laser          | CSpk rate                 |                          | 0.8706      | 3 cells, 2 mice  |
| S2h     | paired t-test    | Pkj-ChR2 spont vs during laser high   | SSpk rate                 |                          | 9.911e-17   | 3 cells, 2 mice  |
| S2h     | paired t-test    | Pkj-ChR2 spont vs post laser high     | SSpk rate                 |                          | 9.86e-20    | 3 cells, 2 mice  |
| S2h     | paired t-test    | Pkj-ChR2 spont vs during laser high   | CSpk rate                 |                          | 1.335e-15   | 3 cells, 2 mice  |
| S2h     | paired t-test    | Pkj-ChR2 spont vs post laser high     | CSpk rate                 |                          | 2.44996e-14 | 3 cells, 2 mice  |
| 4c      | paired t-test    | GC-ChR2 medium vs high                | blink to laser (peak amp) |                          | 0.027       | 4 mice           |
| 4e      | paired t-test    | Gabra6-ChR2 spont vs during laser     | SSpk rate                 |                          | 1.28227e-05 | 3 cells, 2 mice  |
| 4e      | paired t-test    | Gabra6-ChR2 spont vs during laser     | CSpk rate                 |                          | 1           | 3 cells, 2 mice  |
| 5g      | paired t-test    | CF-Jaws spont vs laser                | SSpk rate                 |                          | 0.42        | 4 cells, 2 mice  |
| 5g      | paired t-test    | CF-Jaws spont vs laser                | CSpk rate                 |                          | 0.026       | 4 cells, 2 mice  |
| 5g      | paired t-test    | CF-Jaws airpuff vs airpuff + laser    | CSpk probab               |                          | 0.028       | 4 cells, 2 mice  |
| 5h      | 2 sample t-test  | CF-Jaws laser inhibition vs Jaws ctls | % CR                      | last session of learning | 0.0015      | 4 vs 4 mice      |
| 6b      | 2 sample t-test  | CF-ChR2-puff vs CF-ChR2-LE-puff       | % CR                      | last session of learning | 7.7482e-05  | 4 vs 4 mice      |
| 6b, S1o | 2 sample t-test  | CF-ChR2-LE-puff vs airpuff ctls       | % CR                      | last session of learning | 0.1215      | 4 vs 3 mice      |
| 6b, S1o | 2 sample t-test  | CF-ChR2-puff vs airpuff ctls          | % CR                      | last session of learning | 1.9849e-06  | 4 vs 3 mice      |
| 6e      | 2 sample t-test  | CF-ChR2 vs controls                   | CSpk rate                 |                          | 0.04        | 26 vs 15 cells   |
| 6e      | 2 sample t-test  | CF-ChR2-LE vs controls                | CSpk rate                 |                          | 0.24        | 26 vs 20 cells   |
| 6f      | 2 sample t-test  | CF-ChR2 vs controls                   | CSpk probab               |                          | 0.00003     | 26 vs 15 cells   |
| 6f      | 2 sample t-test  | CF-ChR2-LE vs controls                | CSpk probab               |                          | 0.16        | 26 vs 20 cells   |
| 6g      | 2 sample t-test  | CF-ChR2 vs controls                   | SSpk rate                 |                          | 0.41        | 26 vs 15 cells   |
| 6g      | 2 sample t-test  | CF-ChR2-LE vs controls                | SSpk rate                 |                          | 0.07        | 26 vs 20 cells   |
| 6h      | 2 sample t-test  | CF-ChR2 vs controls                   | SSpk CV                   |                          | 0.33        | 26 vs 15 cells   |
| 6h      | 2 sample t-test  | CF-ChR2-LE vs controls                | SSpk CV                   |                          | 0.26        | 26 vs 20 cells   |
| S3i     | 2 sample ks-test | CF-ChR2 vs controls                   | CSpk timing               |                          | 0.03        | 15 cells, 5 mice |
| S3i     | 2 sample ks-test | CF-ChR2-LE vs controls                | CSpk timing               |                          | 0.67        | 20 cells, 4 mice |
| S3j     | 2 sample t-test  | CF-ChR2 vs controls                   | SSpk pause                |                          | 0.15        | 15 cells, 5 mice |
| S3j     | 2 sample t-test  | CF-ChR2-LE vs controls                | SSpk pause                |                          | 0.24        | 20 cells, 4 mice |
| S3k     | 2 sample t-test  | CF-ChR2 vs controls                   | CSpk spikelets spont      |                          | 0.1         | 15 cells, 5 mice |
| S3k     | 2 sample t-test  | CF-ChR2-LE vs controls                | CSpk spikelets spont      |                          | 0.1         | 20 cells, 4 mice |
| S3l     | 2 sample t-test  | CF-ChR2 vs controls                   | CSpk spikelets airpuff    |                          | 0.5         | 15 cells, 5 mice |
| S3l     | 2 sample t-test  | CF-ChR2-LE vs controls                | CSpk spikelets airpuff    |                          | 0.3         | 20 cells, 4 mice |
| S3m     | 2 sample t-test  | CF-ChR2 vs controls                   | CSpk doublets             |                          | 0.14        | 15 cells, 5 mice |
| S3m     | 2 sample t-test  | CF-ChR2-LE vs controls                | CSpk doublets             |                          | 0.24        | 20 cells, 4 mice |

**Supplementary Table 2: Information about statistical tests. All tests were two-sided.**
